# Supplementary material for: Multiple chromosomal rearrangements in a hybrid zone between Littorina saxatilis ecotypes
Source: PubMed Central journal article supplement (PMC6518922; doi:10.1111/mec.14972), 2019-02-25

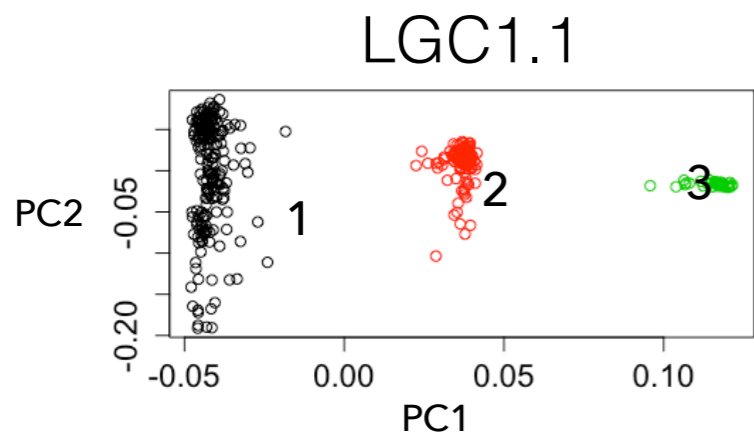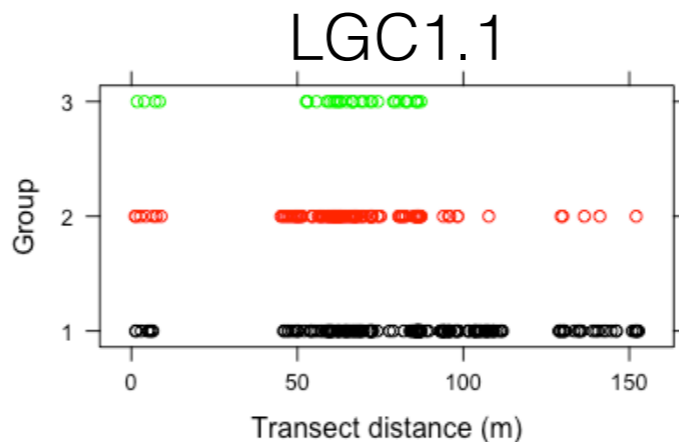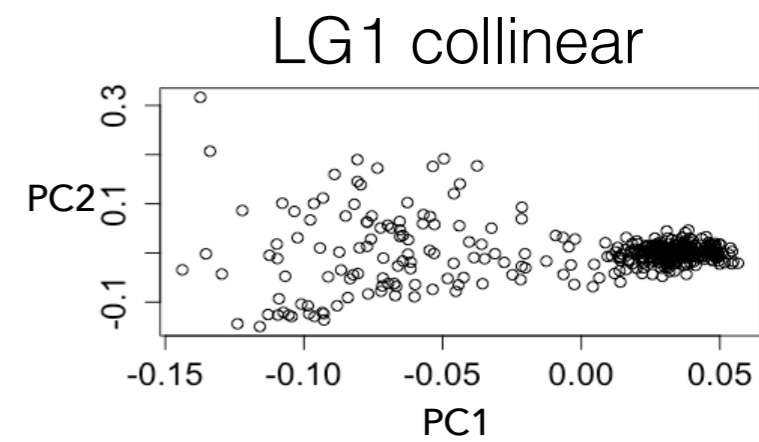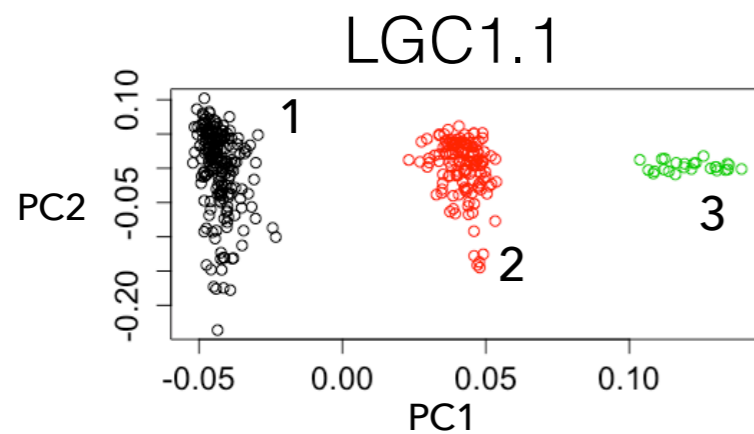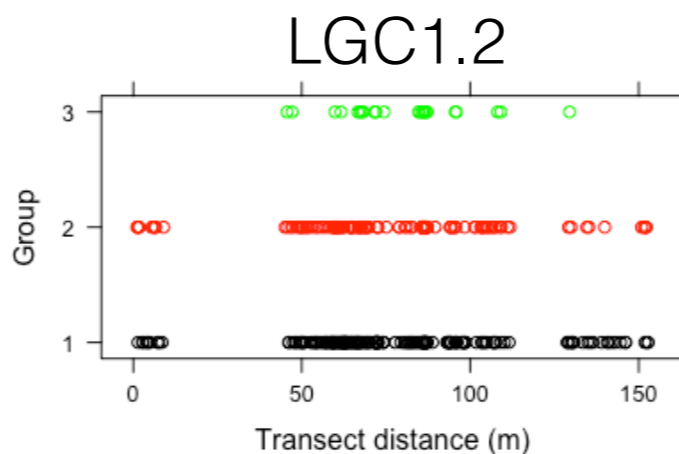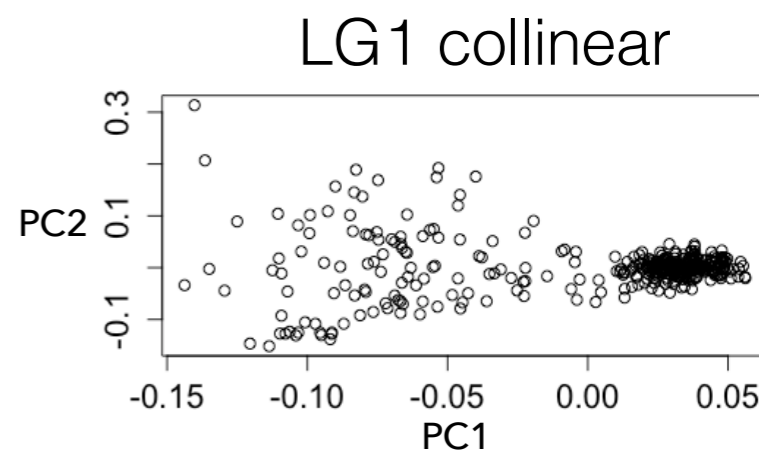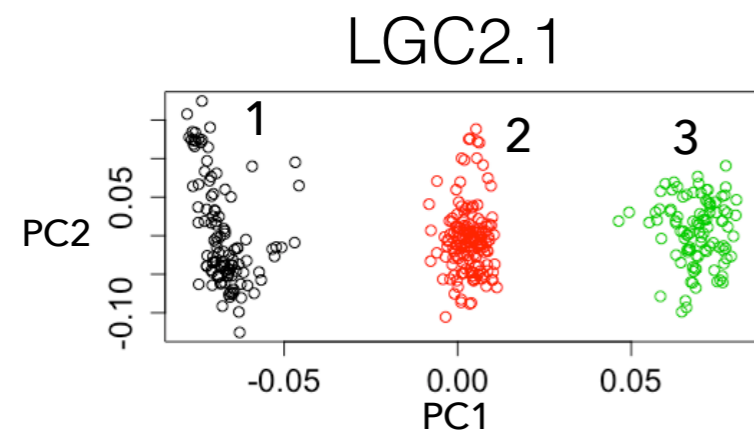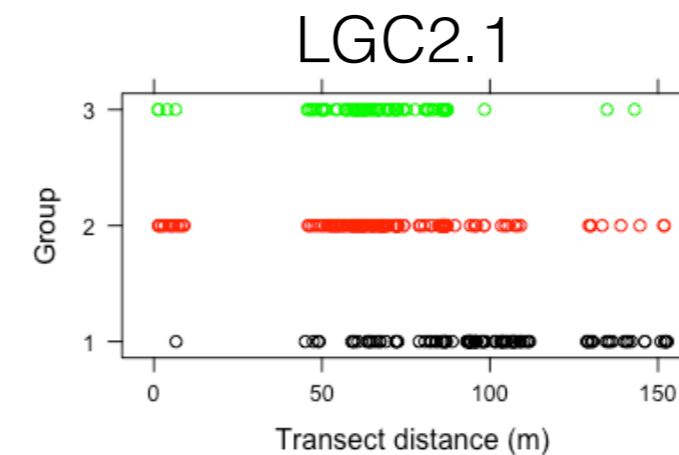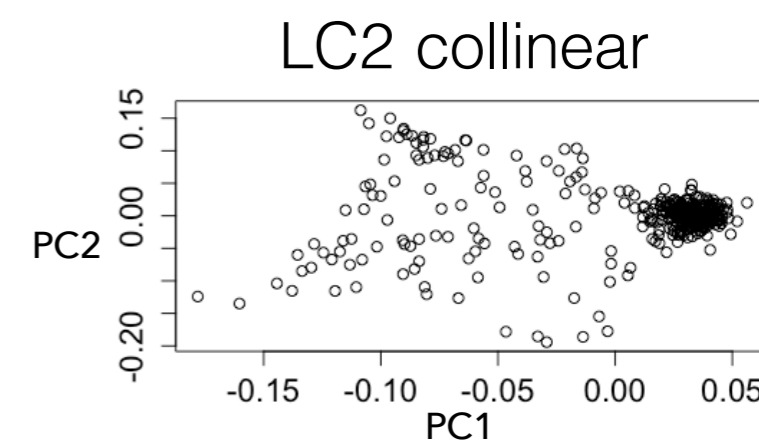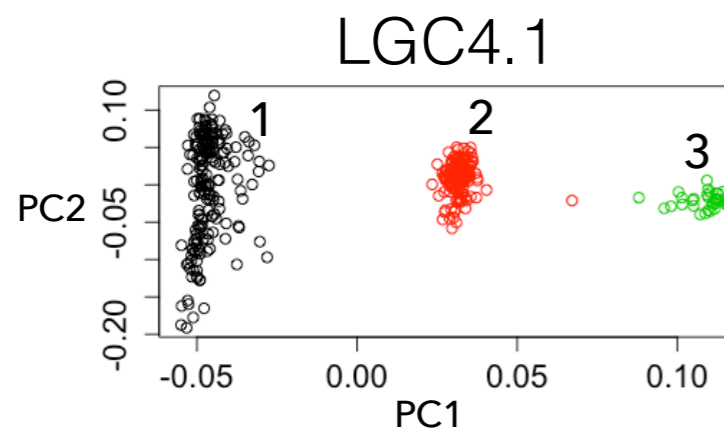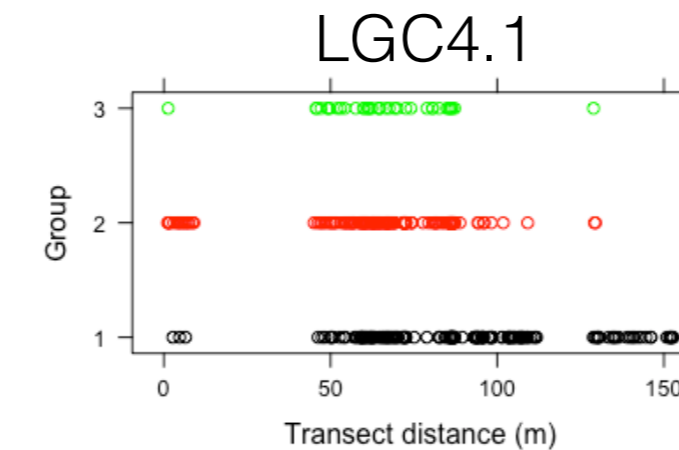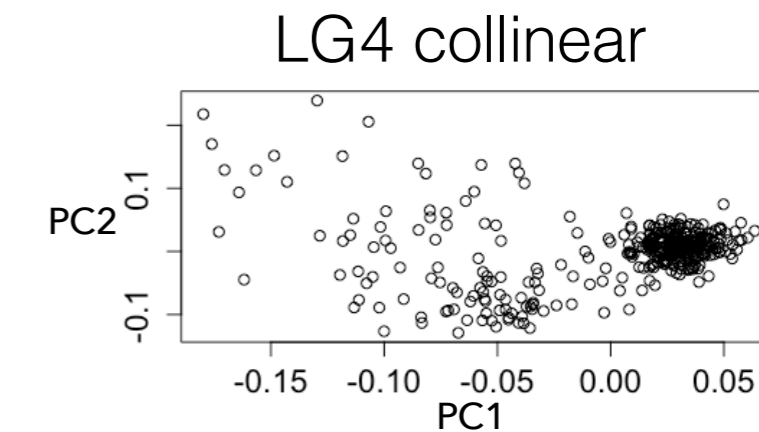

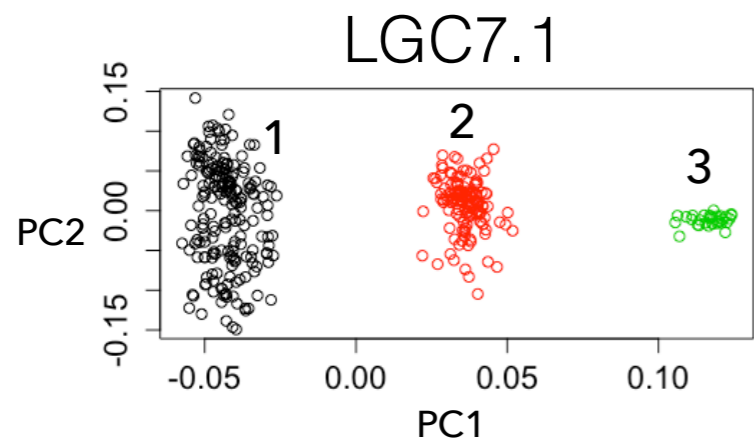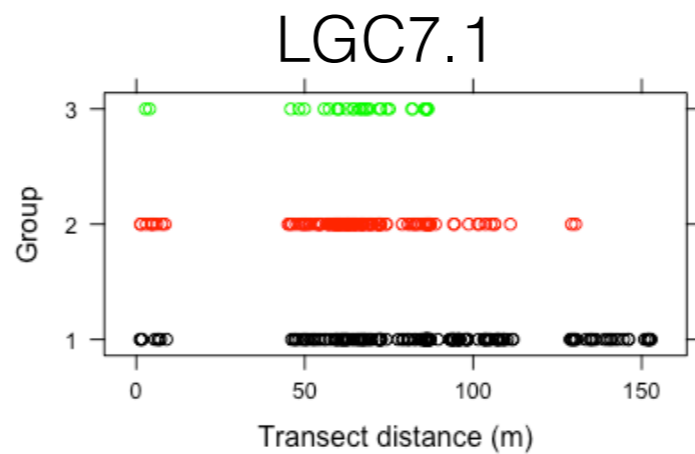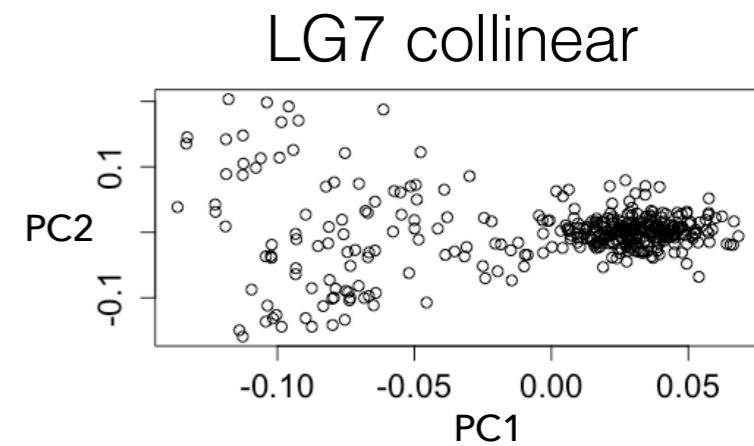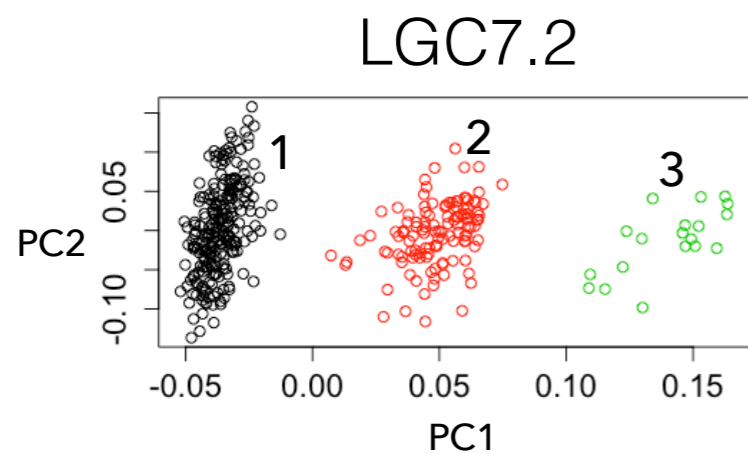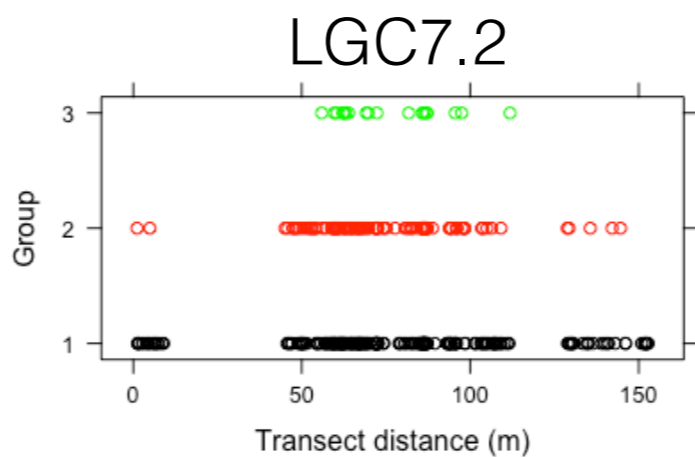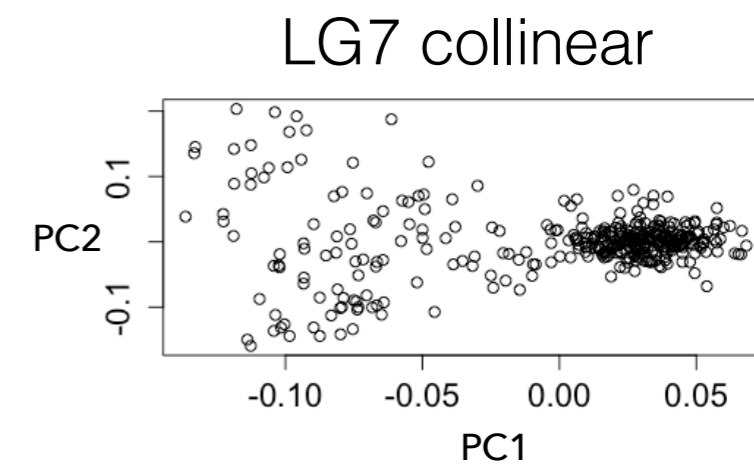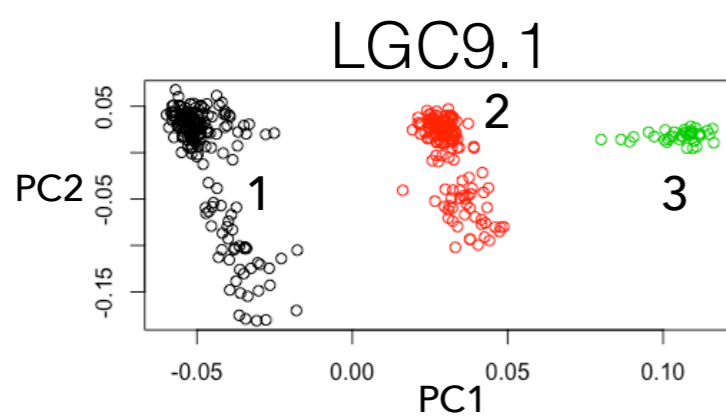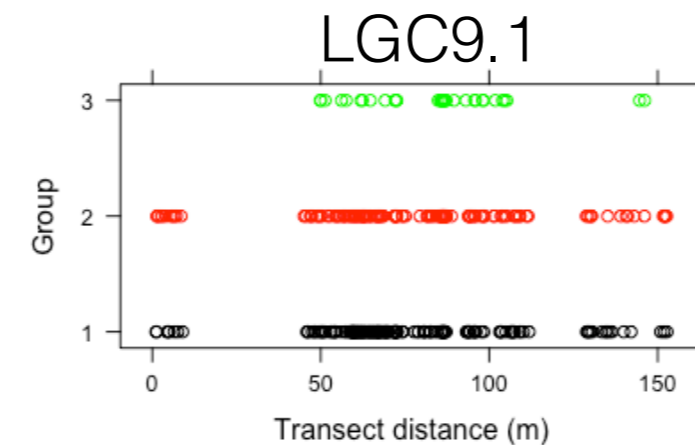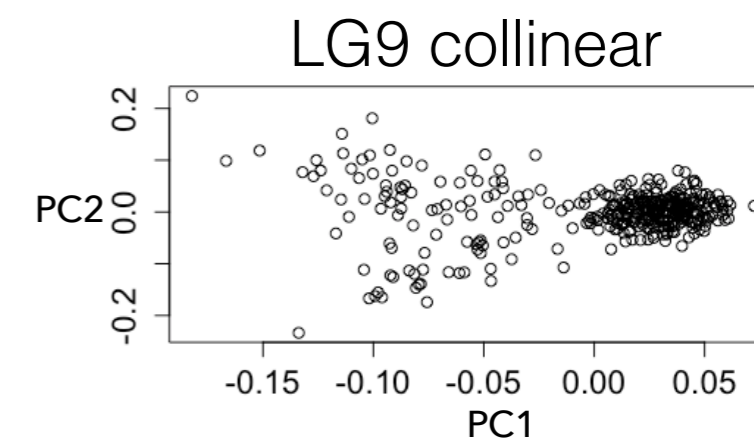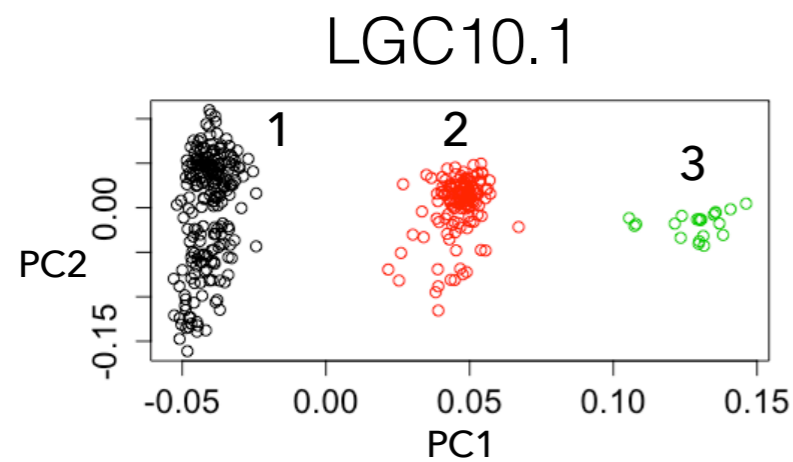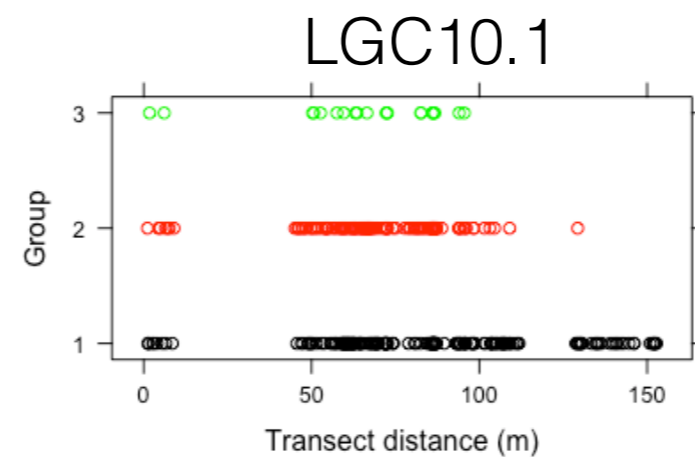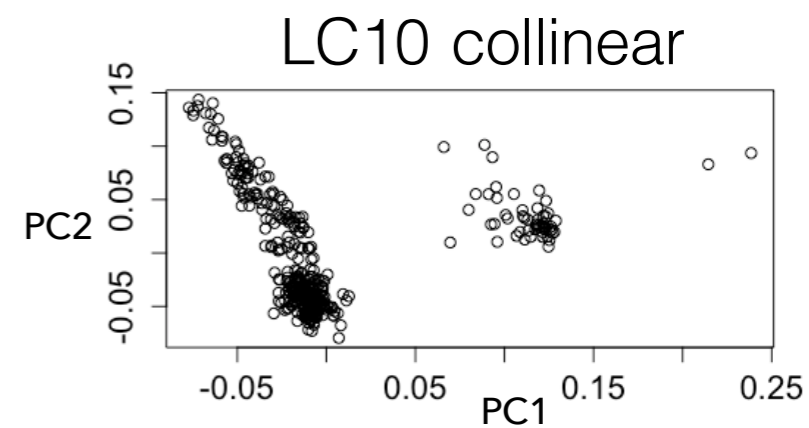

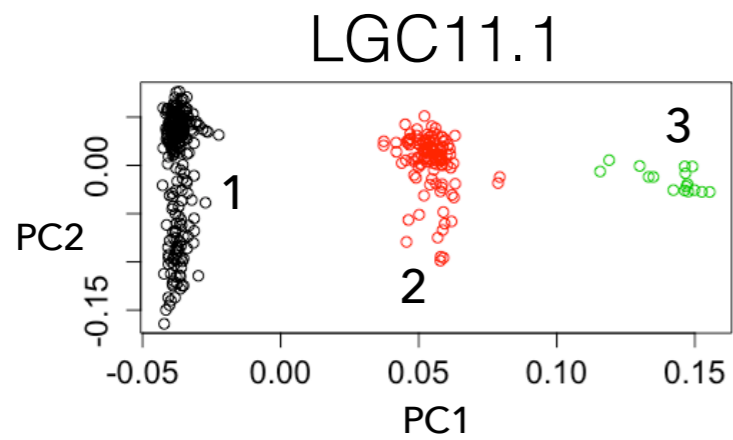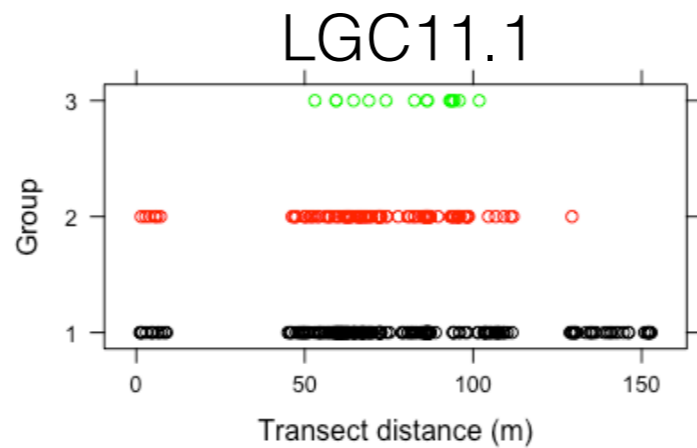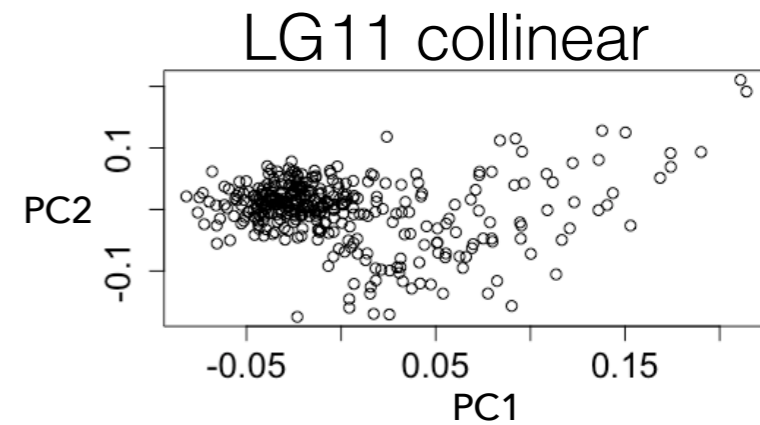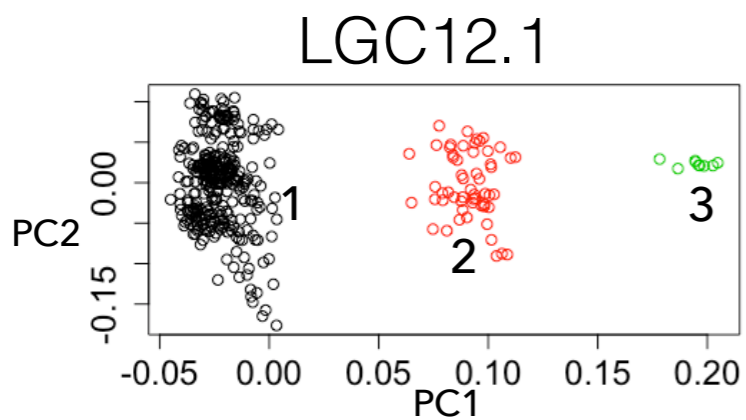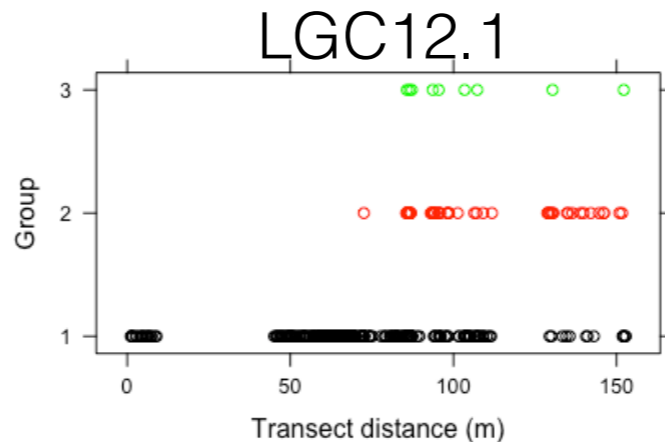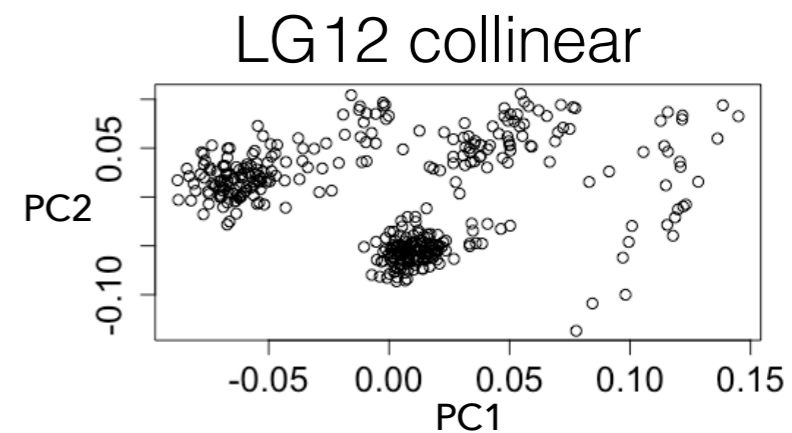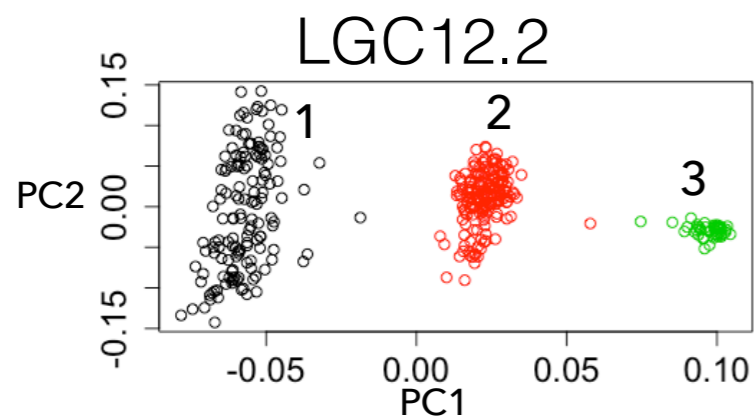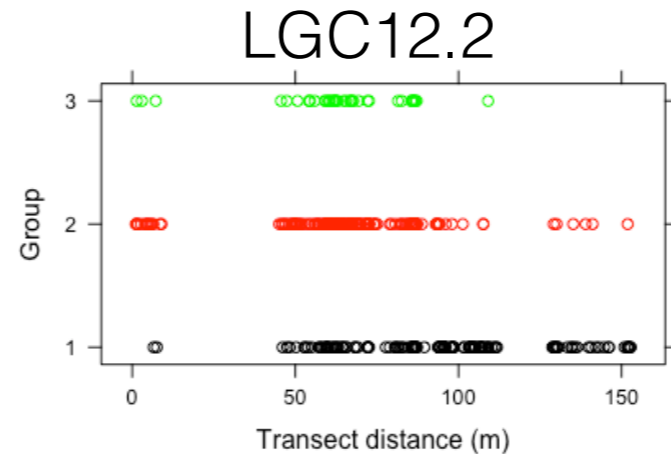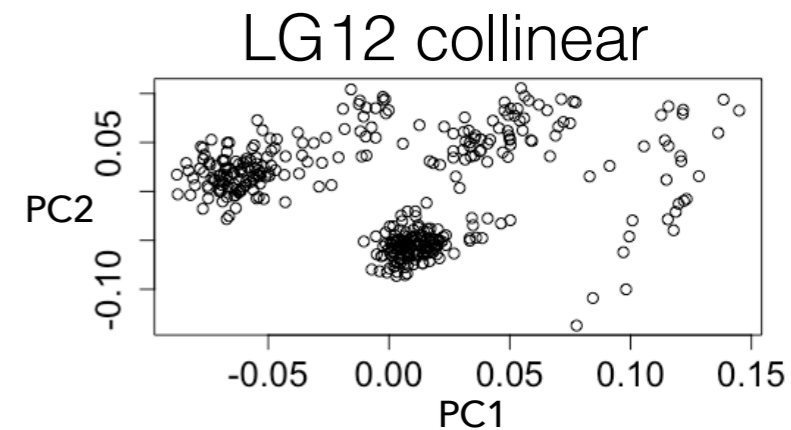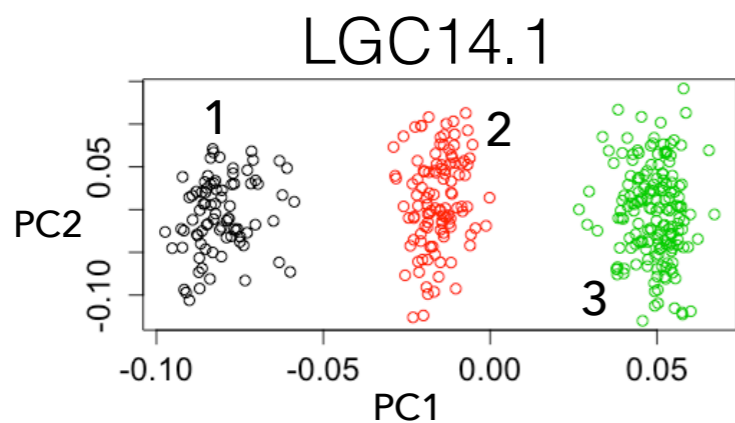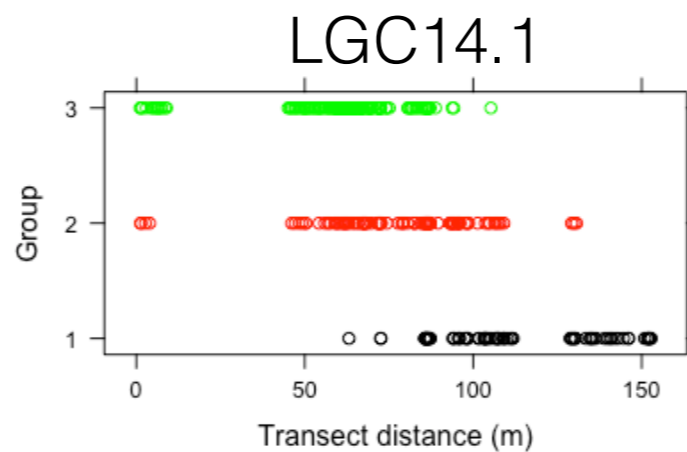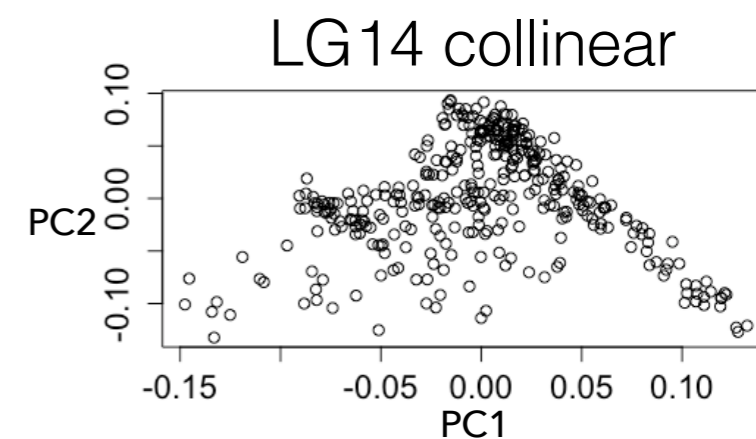

LGC14.2

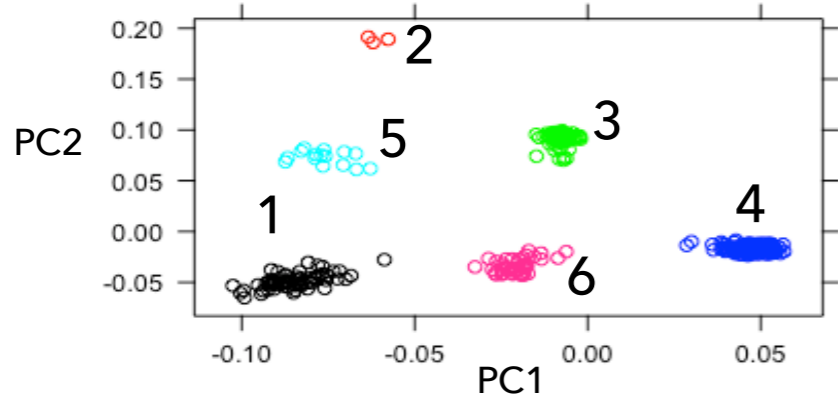

LGC14.2

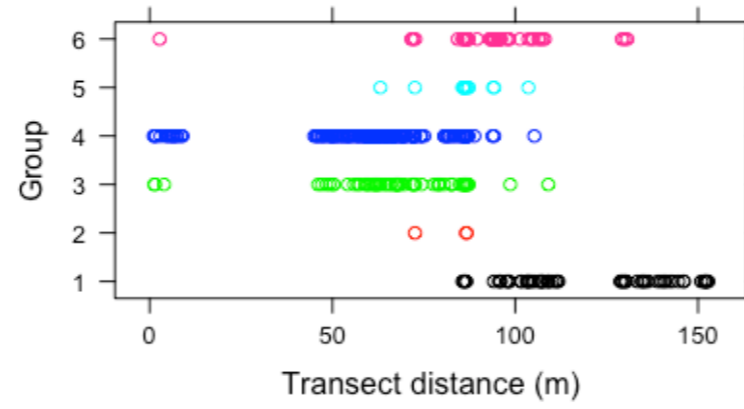

LG14 collinear

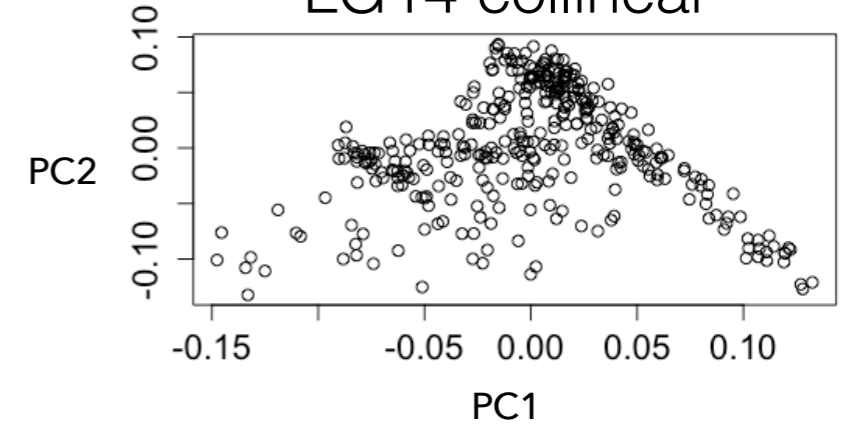

LGC14.3

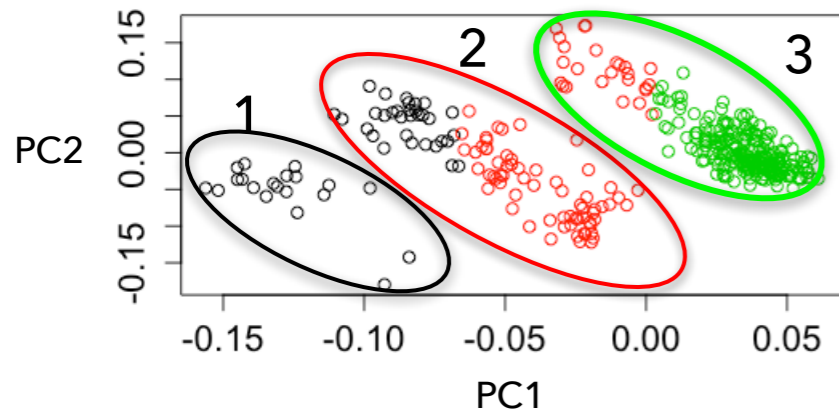

LGC14.3

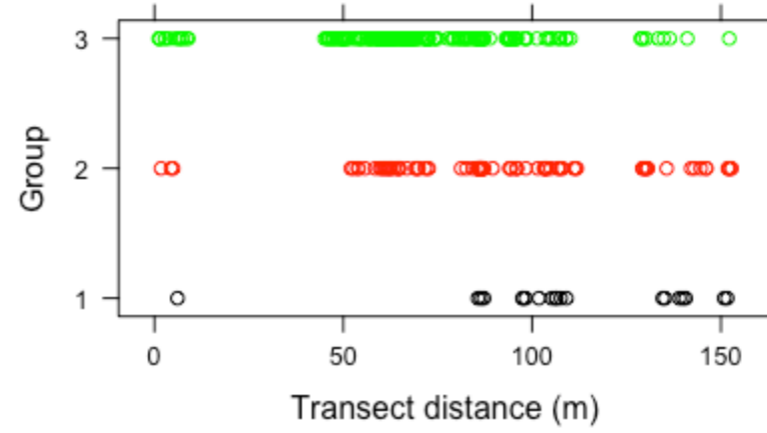

LG14 collinear

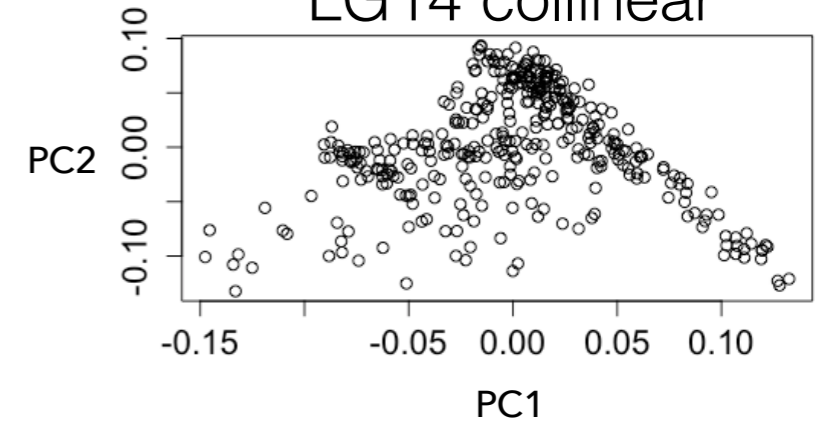

Supplement: MEC-28-1375-s001.pdf [file MEC-28-1375-s001.pdf]
