# Supplementary material for: Multiple chromosomal rearrangements in a hybrid zone between Littorina saxatilis ecotypes
Source: PubMed Central journal article supplement (PMC6518922; doi:10.1111/mec.14972), 2019-02-25

**LGC1.1**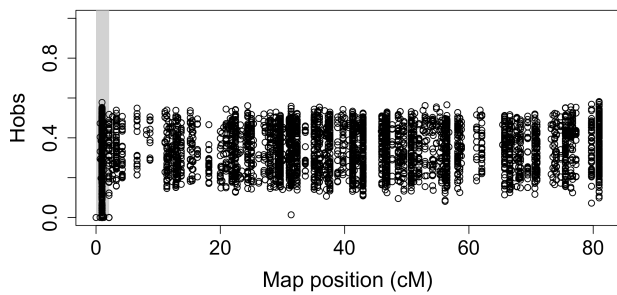**LGC1.1**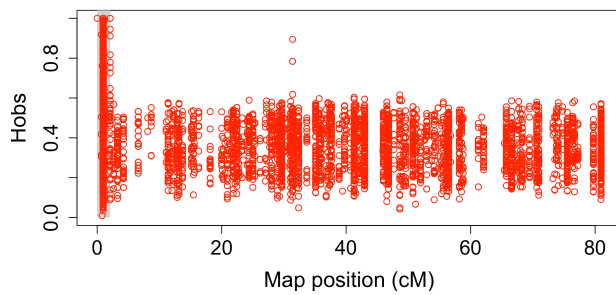**LGC1.1**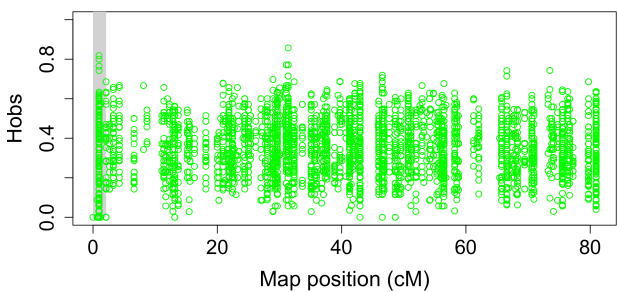**LGC1.2**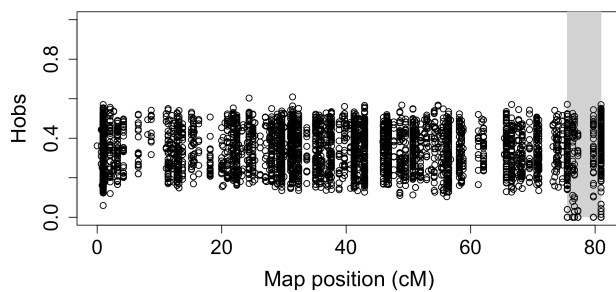**LGC1.2**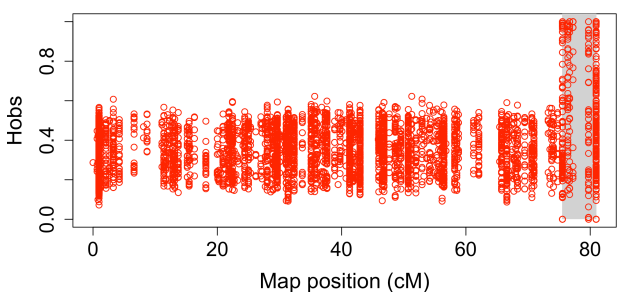**LGC1.2**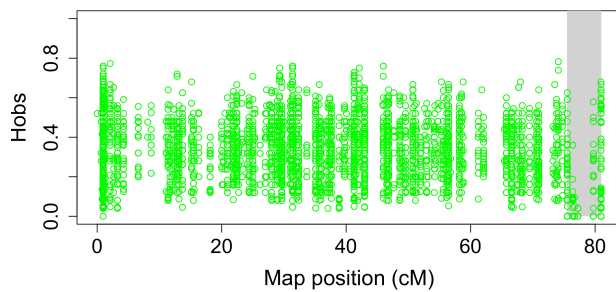**LGC2.1**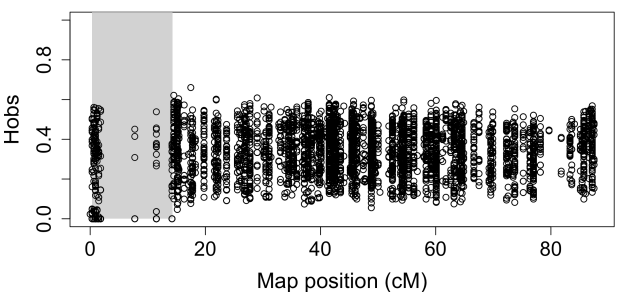**LGC2.1**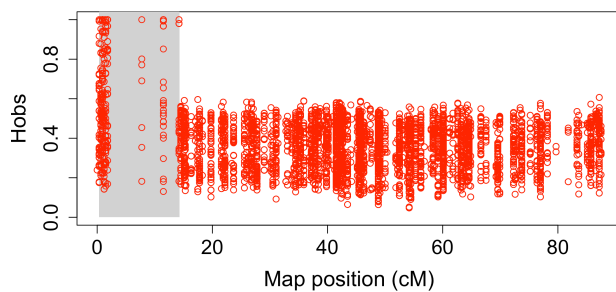**LGC2.1**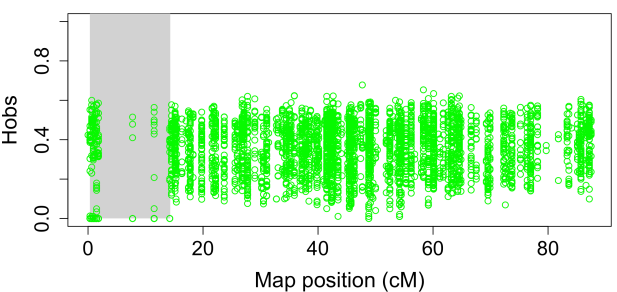**LGC4.1**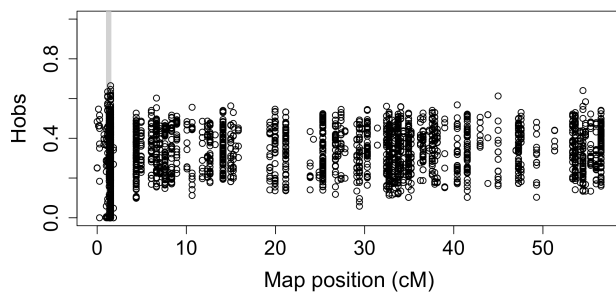**LGC4.1**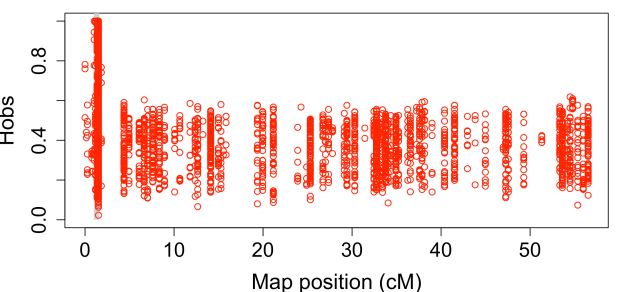**LGC4.1**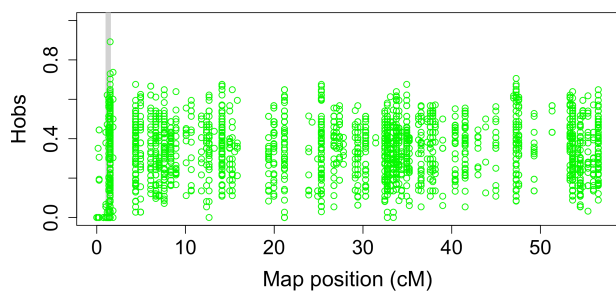

LGC6.1

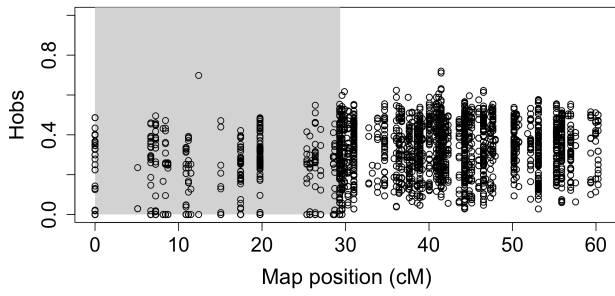

LGC6.1

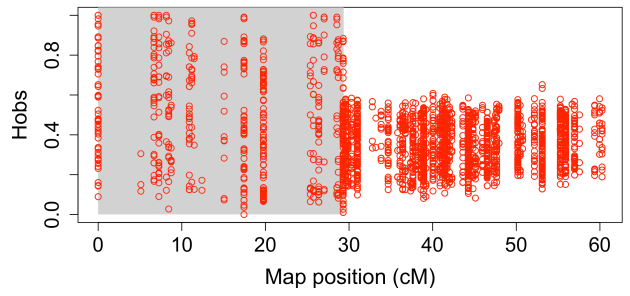

LGC6.1

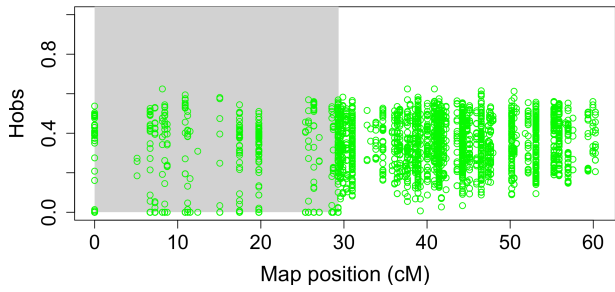

LGC6.2 Group1

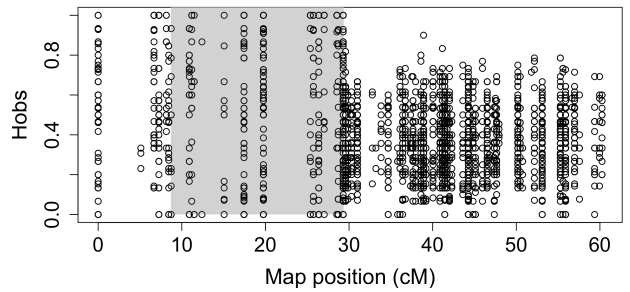

LGC6.2 Group2

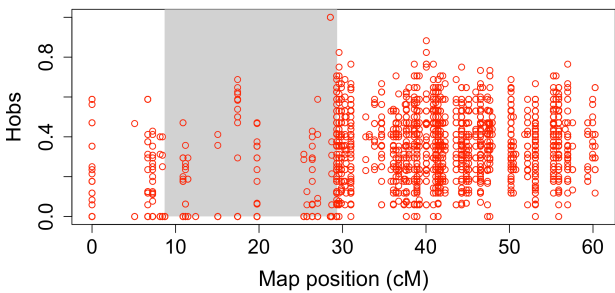

LGC6.2 Group3

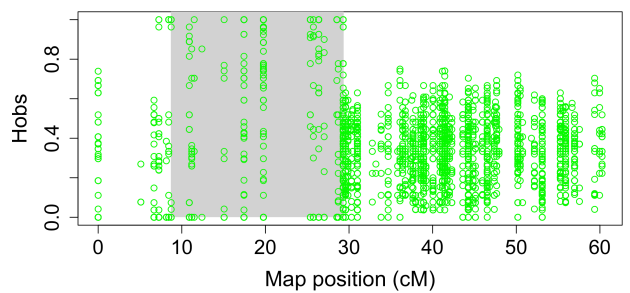

LGC6.2 Group4

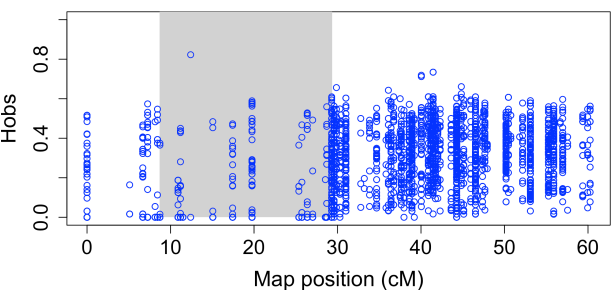

LGC6.2 Group5

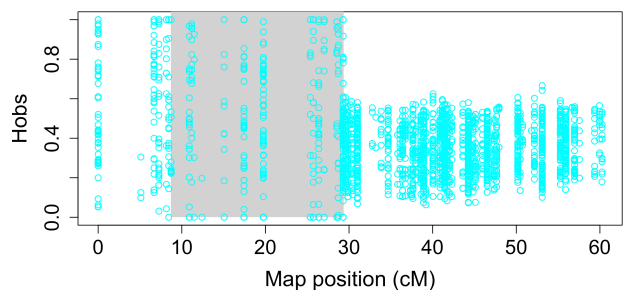

LGC6.2 Group6

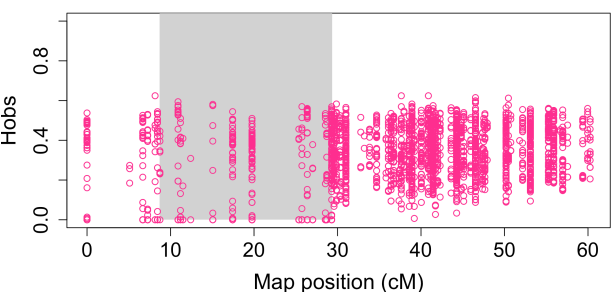

LGC7.1

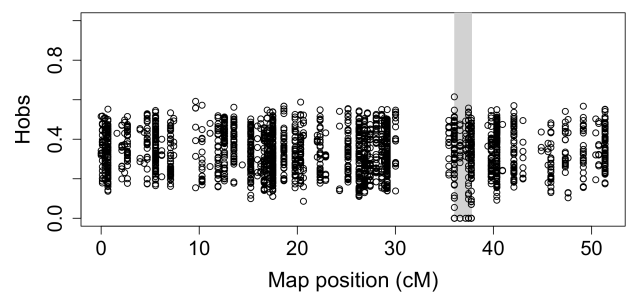

LGC7.1

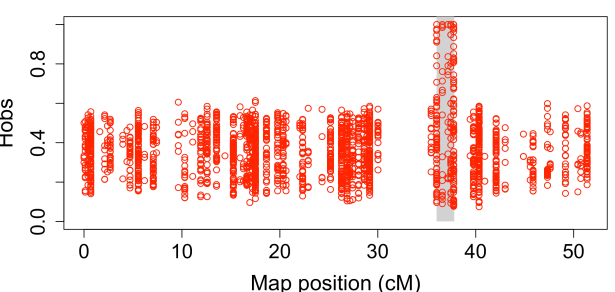

LGC7.1

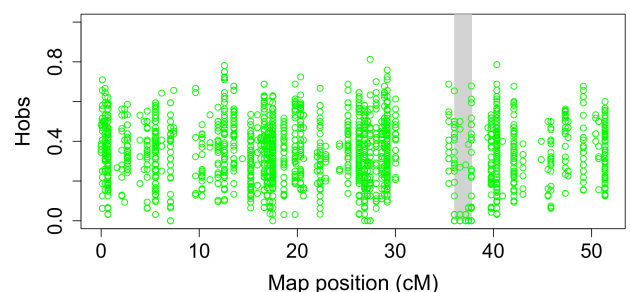

**LGC7.2**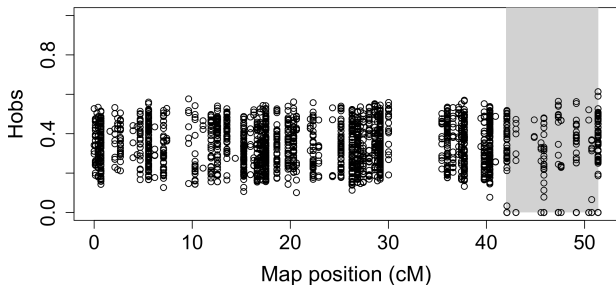**LGC7.2**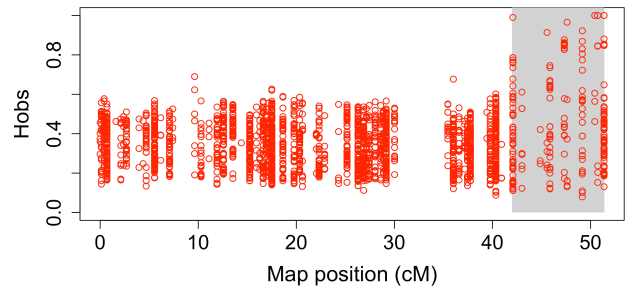**LGC7.2**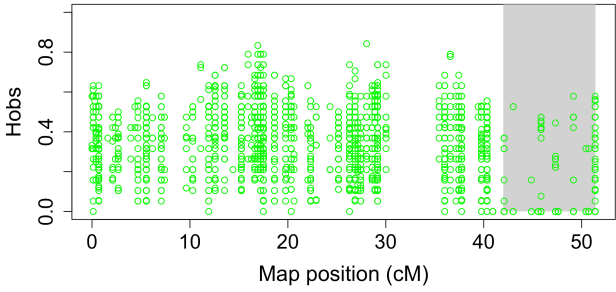**LGC9.1**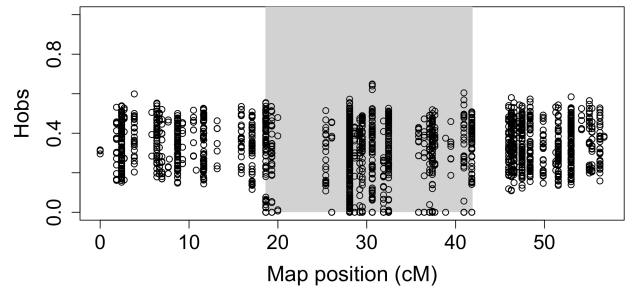**LGC9.1**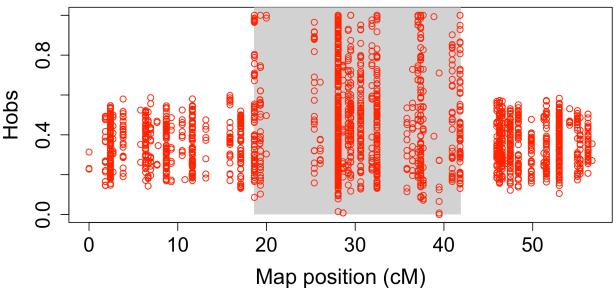**LGC9.1**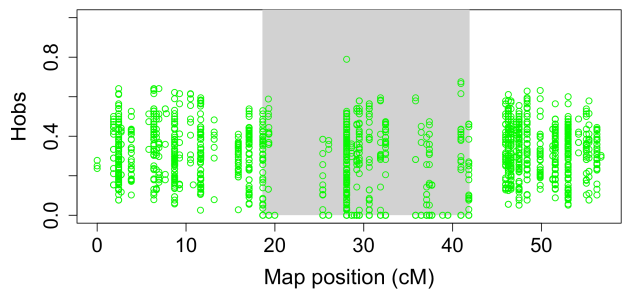**LGC10.1**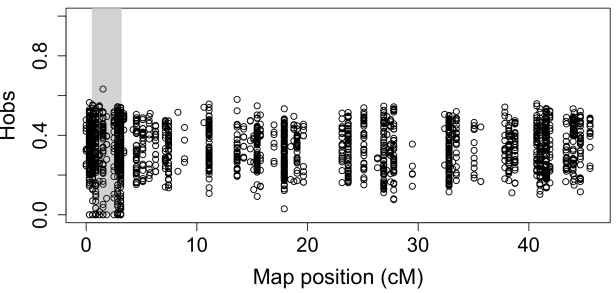**LGC10.1**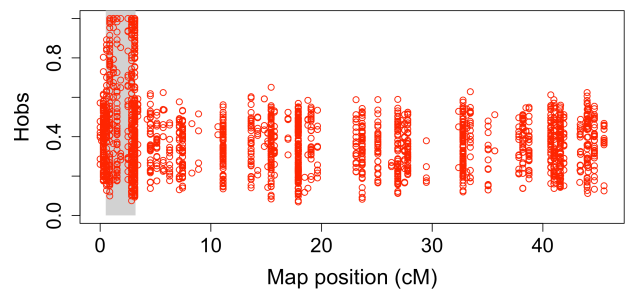**LGC10.1**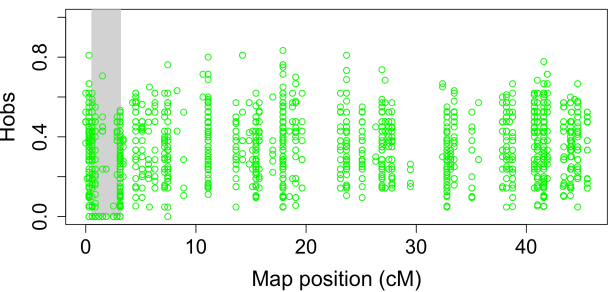**LGC11.1**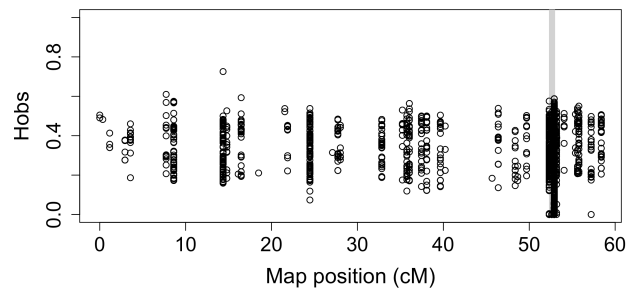**LGC11.1**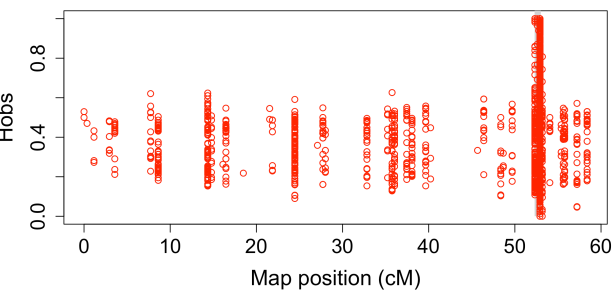**LGC11.1**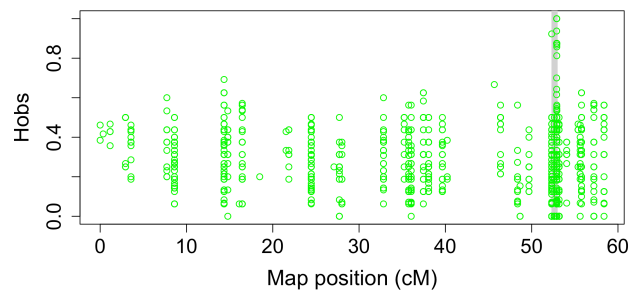

**LGC12.1**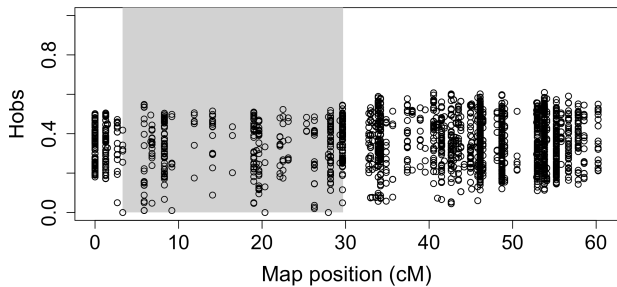**LGC12.1**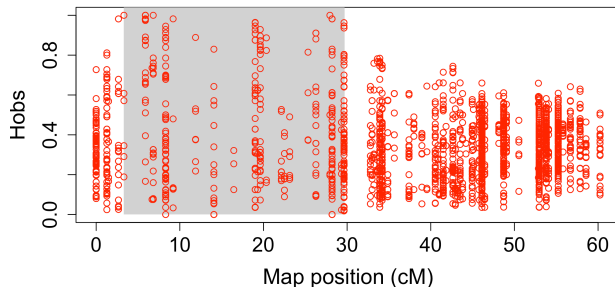**LGC12.1**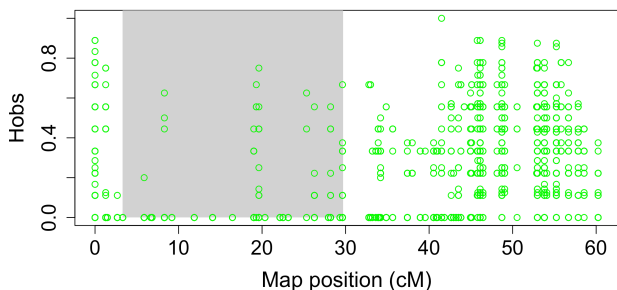**LGC12.2**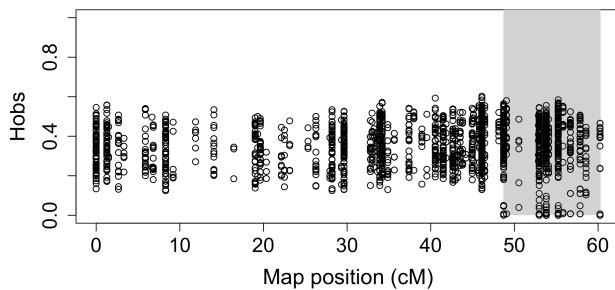**LGC12.2**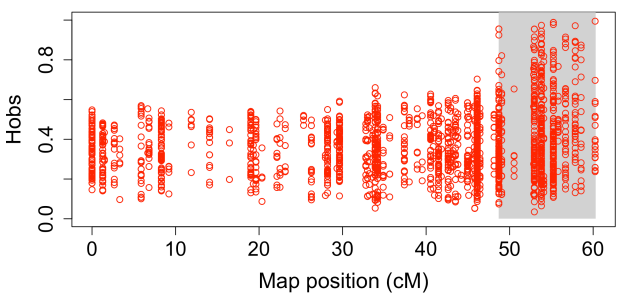**LGC12.2**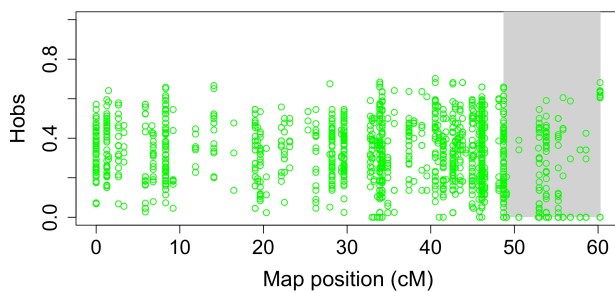**LGC14.1**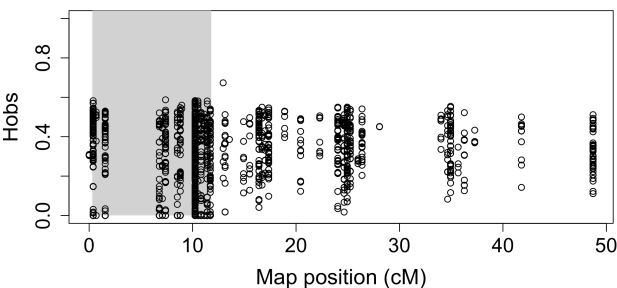**LGC14.1**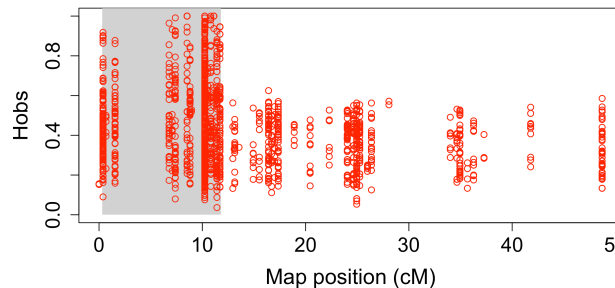**LGC14.1**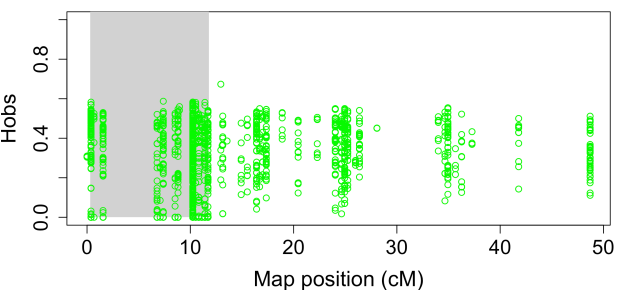**LGC14.2 Group1**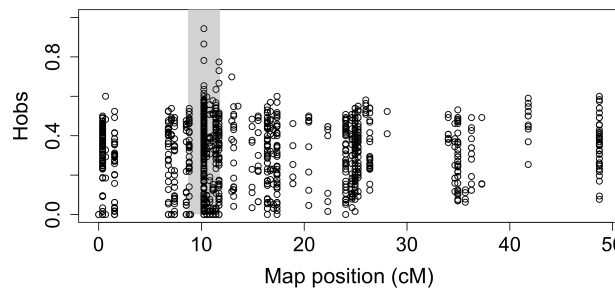**LGC14.2 Group2**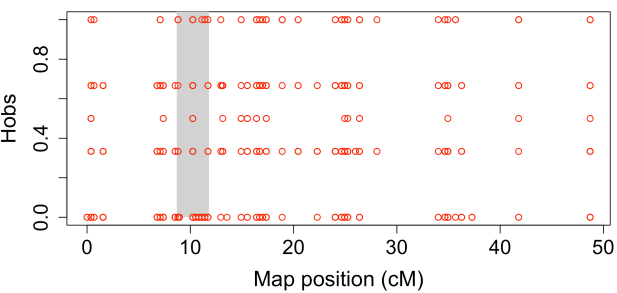**LGC14.2 Group3**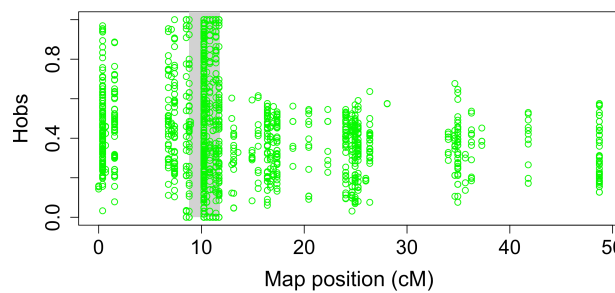



**LGC14.2 Group4**

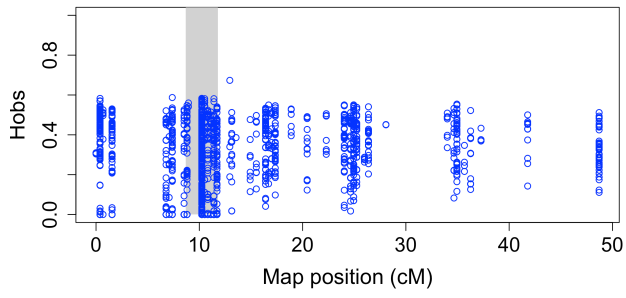

**LGC14.2 Group5**

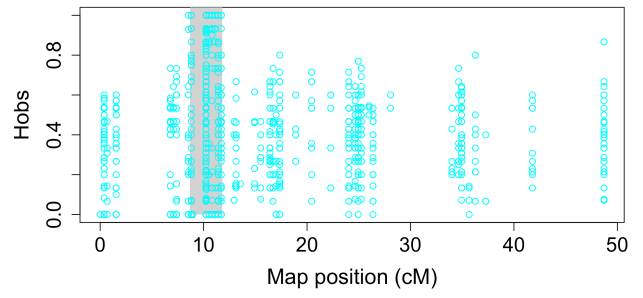

**LGC14.2 Group6**

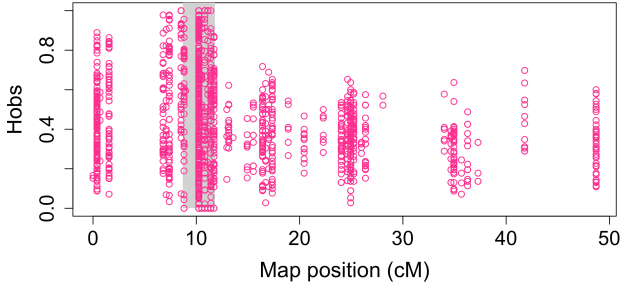

**LGC14.3**

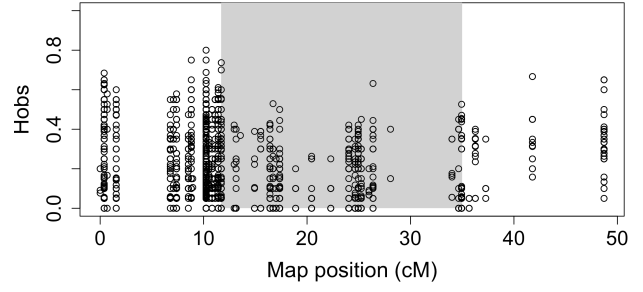

**LGC14.3**

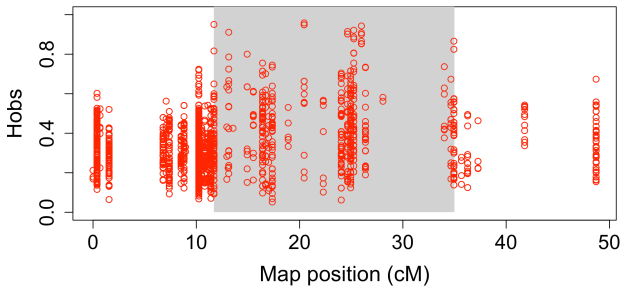

**LGC14.3**

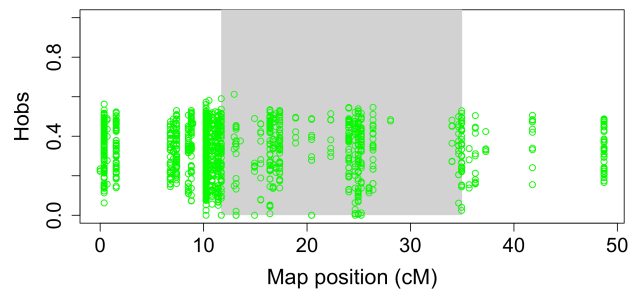

Supplement: MEC-28-1375-s002.pdf [file MEC-28-1375-s002.pdf]
