# Supplementary material for: Multiple chromosomal rearrangements in a hybrid zone between Littorina saxatilis ecotypes
Source: PubMed Central journal article supplement (PMC6518922; doi:10.1111/mec.14972), 2019-02-25

**LGC1.1**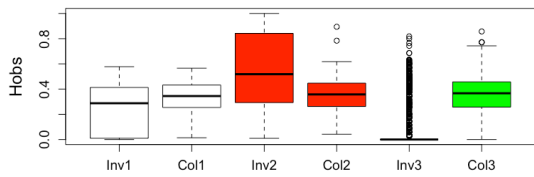**LGC1.2**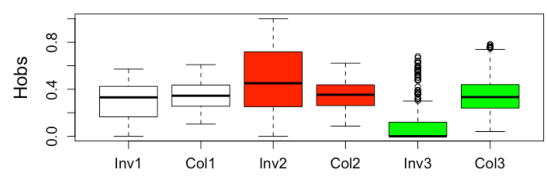**LGC2.1**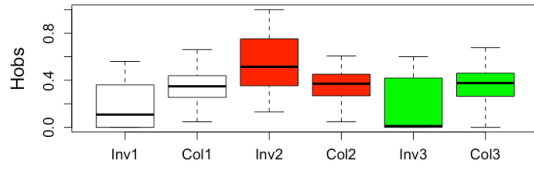**LGC4.1**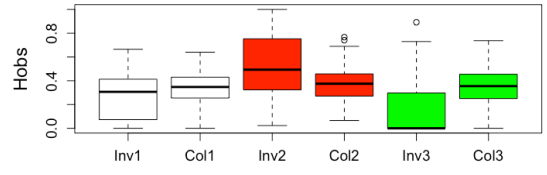**LGC6.1**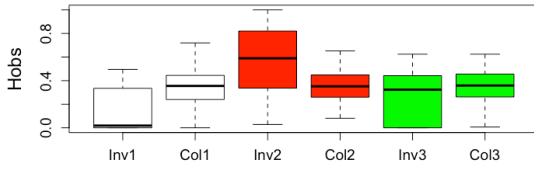**LGC7.1**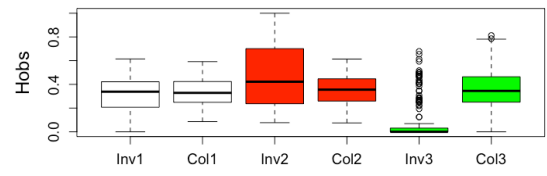**LGC7.2**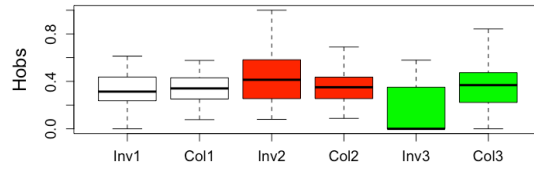**LGC9.1**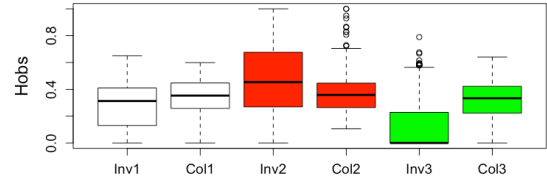**LGC10.1**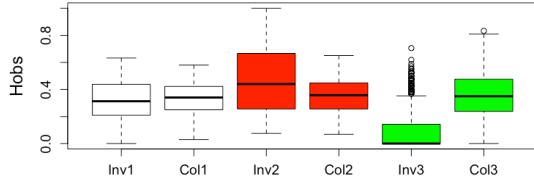**LGC11.1**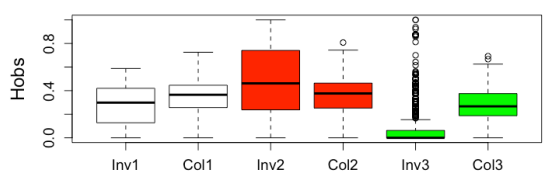**LGC12.1**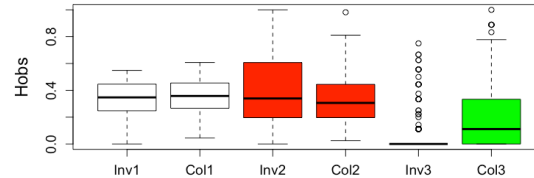**LGC12.2**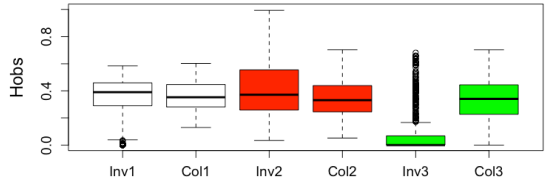**LGC14.1**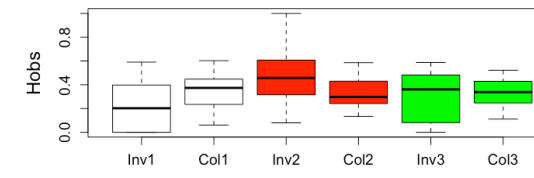**LGC14.2**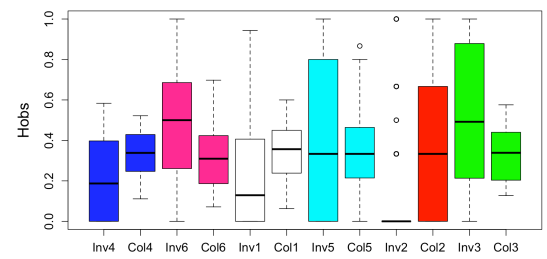**LGC14.3**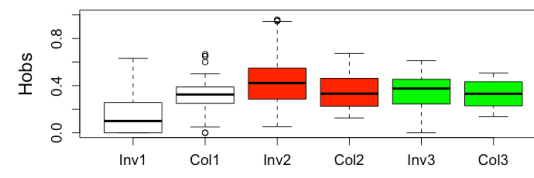**LGC17.1**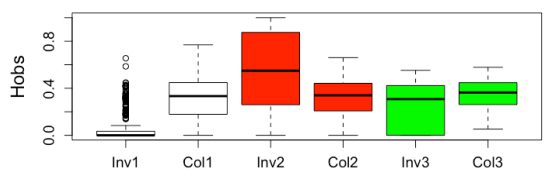

Supplement: MEC-28-1375-s003.pdf [file MEC-28-1375-s003.pdf]
