# Supplementary material for: Multiple chromosomal rearrangements in a hybrid zone between Littorina saxatilis ecotypes
Source: PubMed Central journal article supplement (PMC6518922; doi:10.1111/mec.14972), 2019-02-25

**LGC14.1**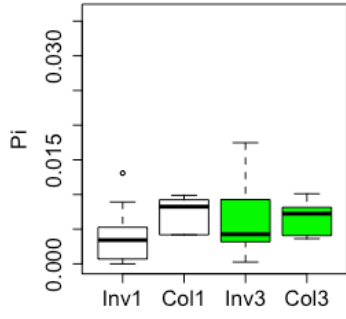**LGC14.2 1vs2**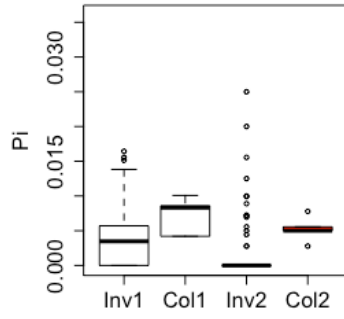**LGC14.2 1vs4**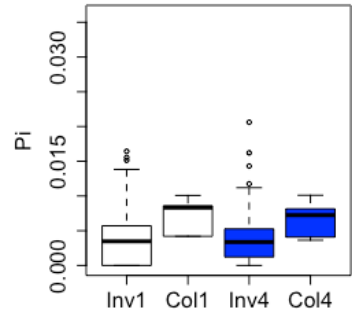**LGC14.2 2vs4**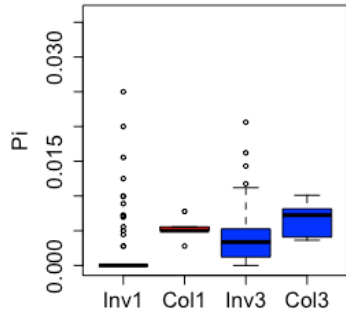**LGC14.3**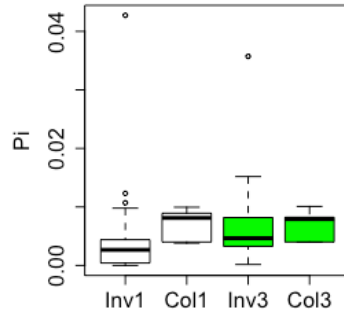

Supplement: MEC-28-1375-s005.pdf [file MEC-28-1375-s005.pdf]
